# Supplementary material for: Epstein–Barr Virus–Encoded Circular RNA CircBART2.2 Promotes Immune Escape of Nasopharyngeal Carcinoma by Regulating PD-L1
Source: PubMed Central journal article supplement — Cancer Res. 2021 Jul 28;81(19):5074–88. doi: 10.1158/0008-5472.CAN-20-4321 (PMC8974435; doi:10.1158/0008-5472.can-20-4321), 2021-07-28
Supplement: canres-81-5074-s006.pdf [file canres-81-5074-s006.pdf]

**Fig.S1**

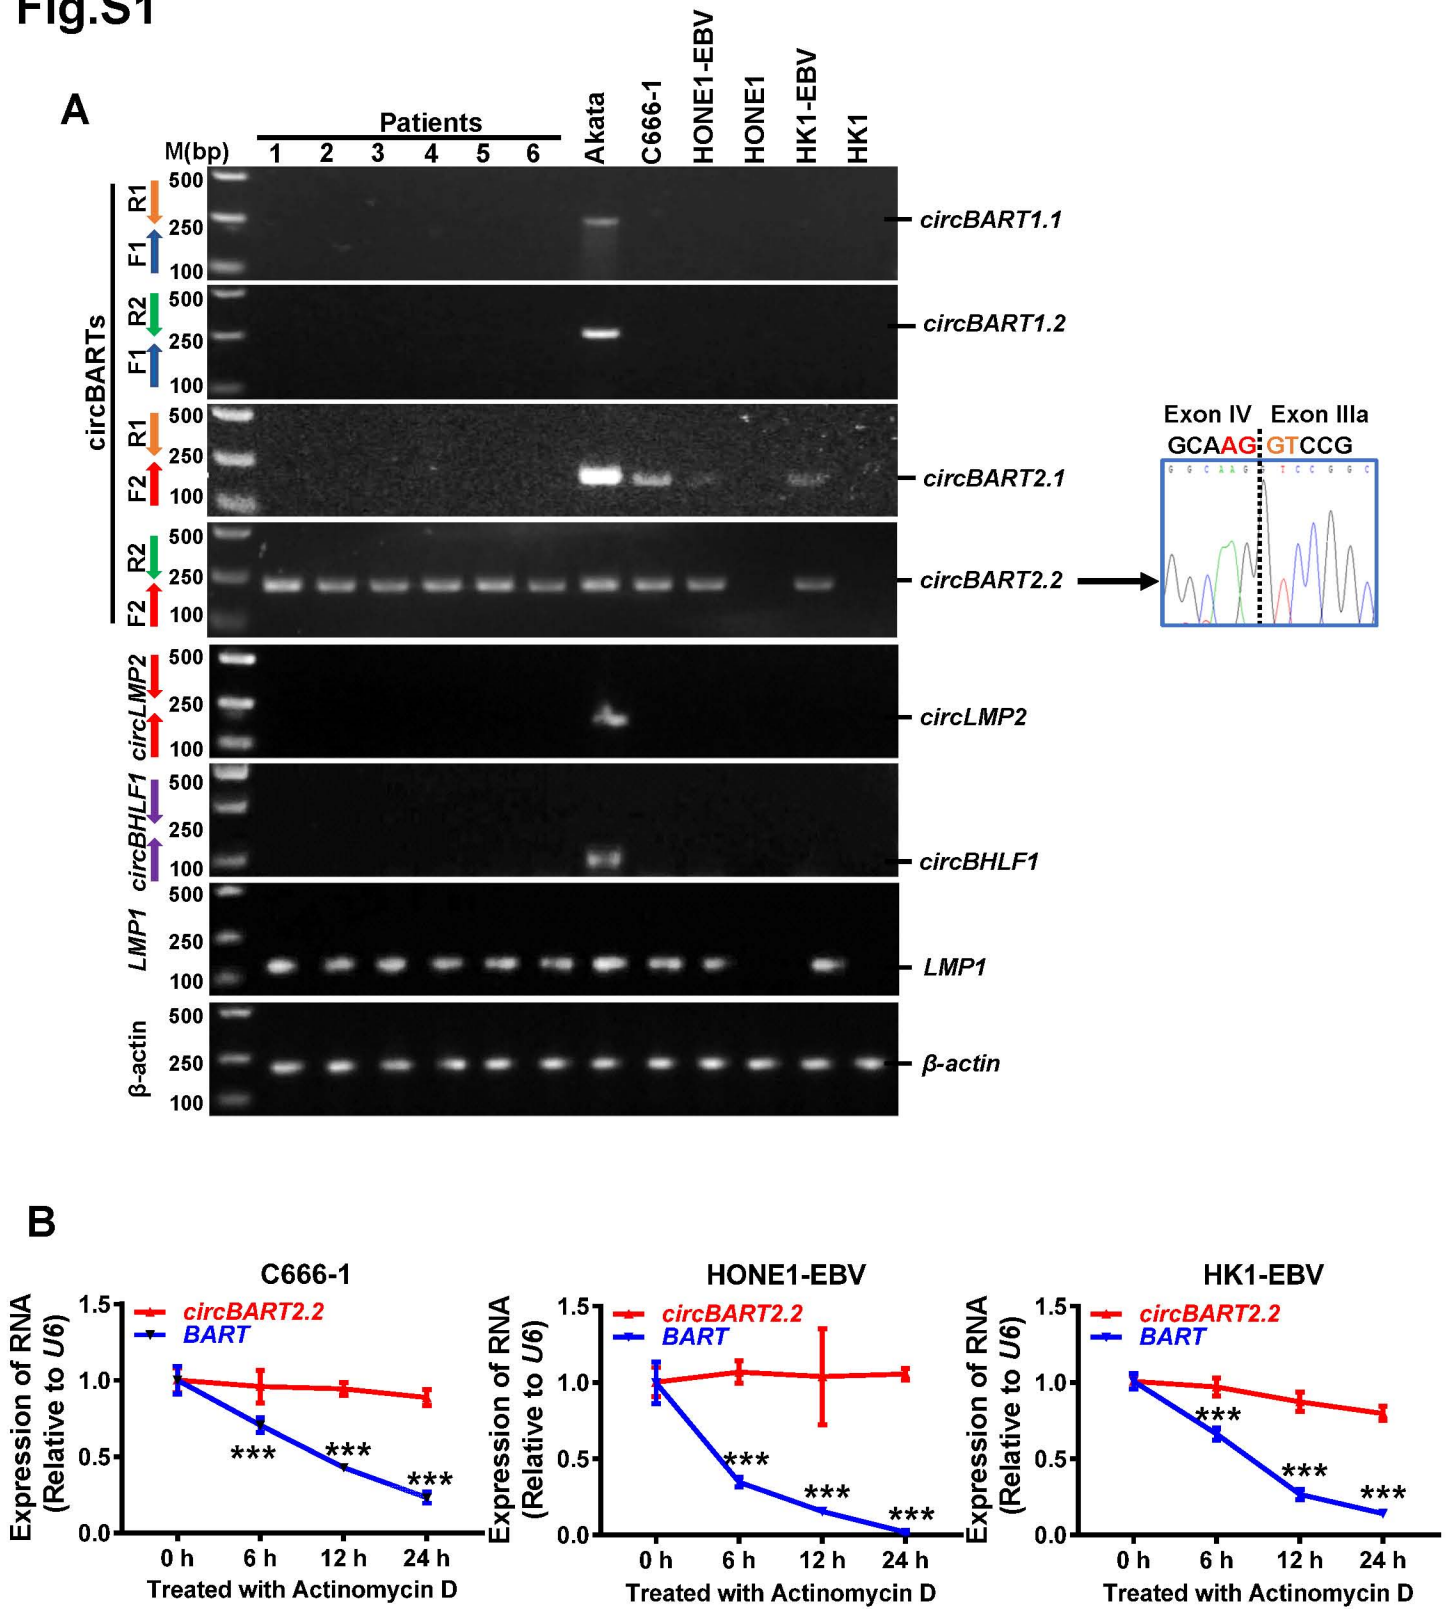

## Supplementary Data

### Fig. S1. Detection of EBV-encoded circRNAs in EBV positive NPC cells

- A. The expression of EBV-encoded circRNAs was examined in Akata, C666-1, HONE1-EBV, and HK1-EBV cells and six NPC clinical samples by real-time PCR (RT-PCR). EBV-negative HONE1 and HK1 cells were used as negative controls. Sanger sequencing was used to confirm the presence of *circBART2.2*. The linear *LMP1* mRNA and  $\beta$ -*actin* mRNA were used as negative controls.
- B. The stability of *circBART2.2*, and the linear BART gene was examined in C666-1, HONE1-EBV, and HK1-EBV cells after actinomycin D (1 $\mu$ g/mL) treatment for 0,6,12, and 24 h. U6 RNA was used as an internal control, and BART mRNA was selected as a negative control. \*\*\*, P< 0.001.

**Fig.S2**

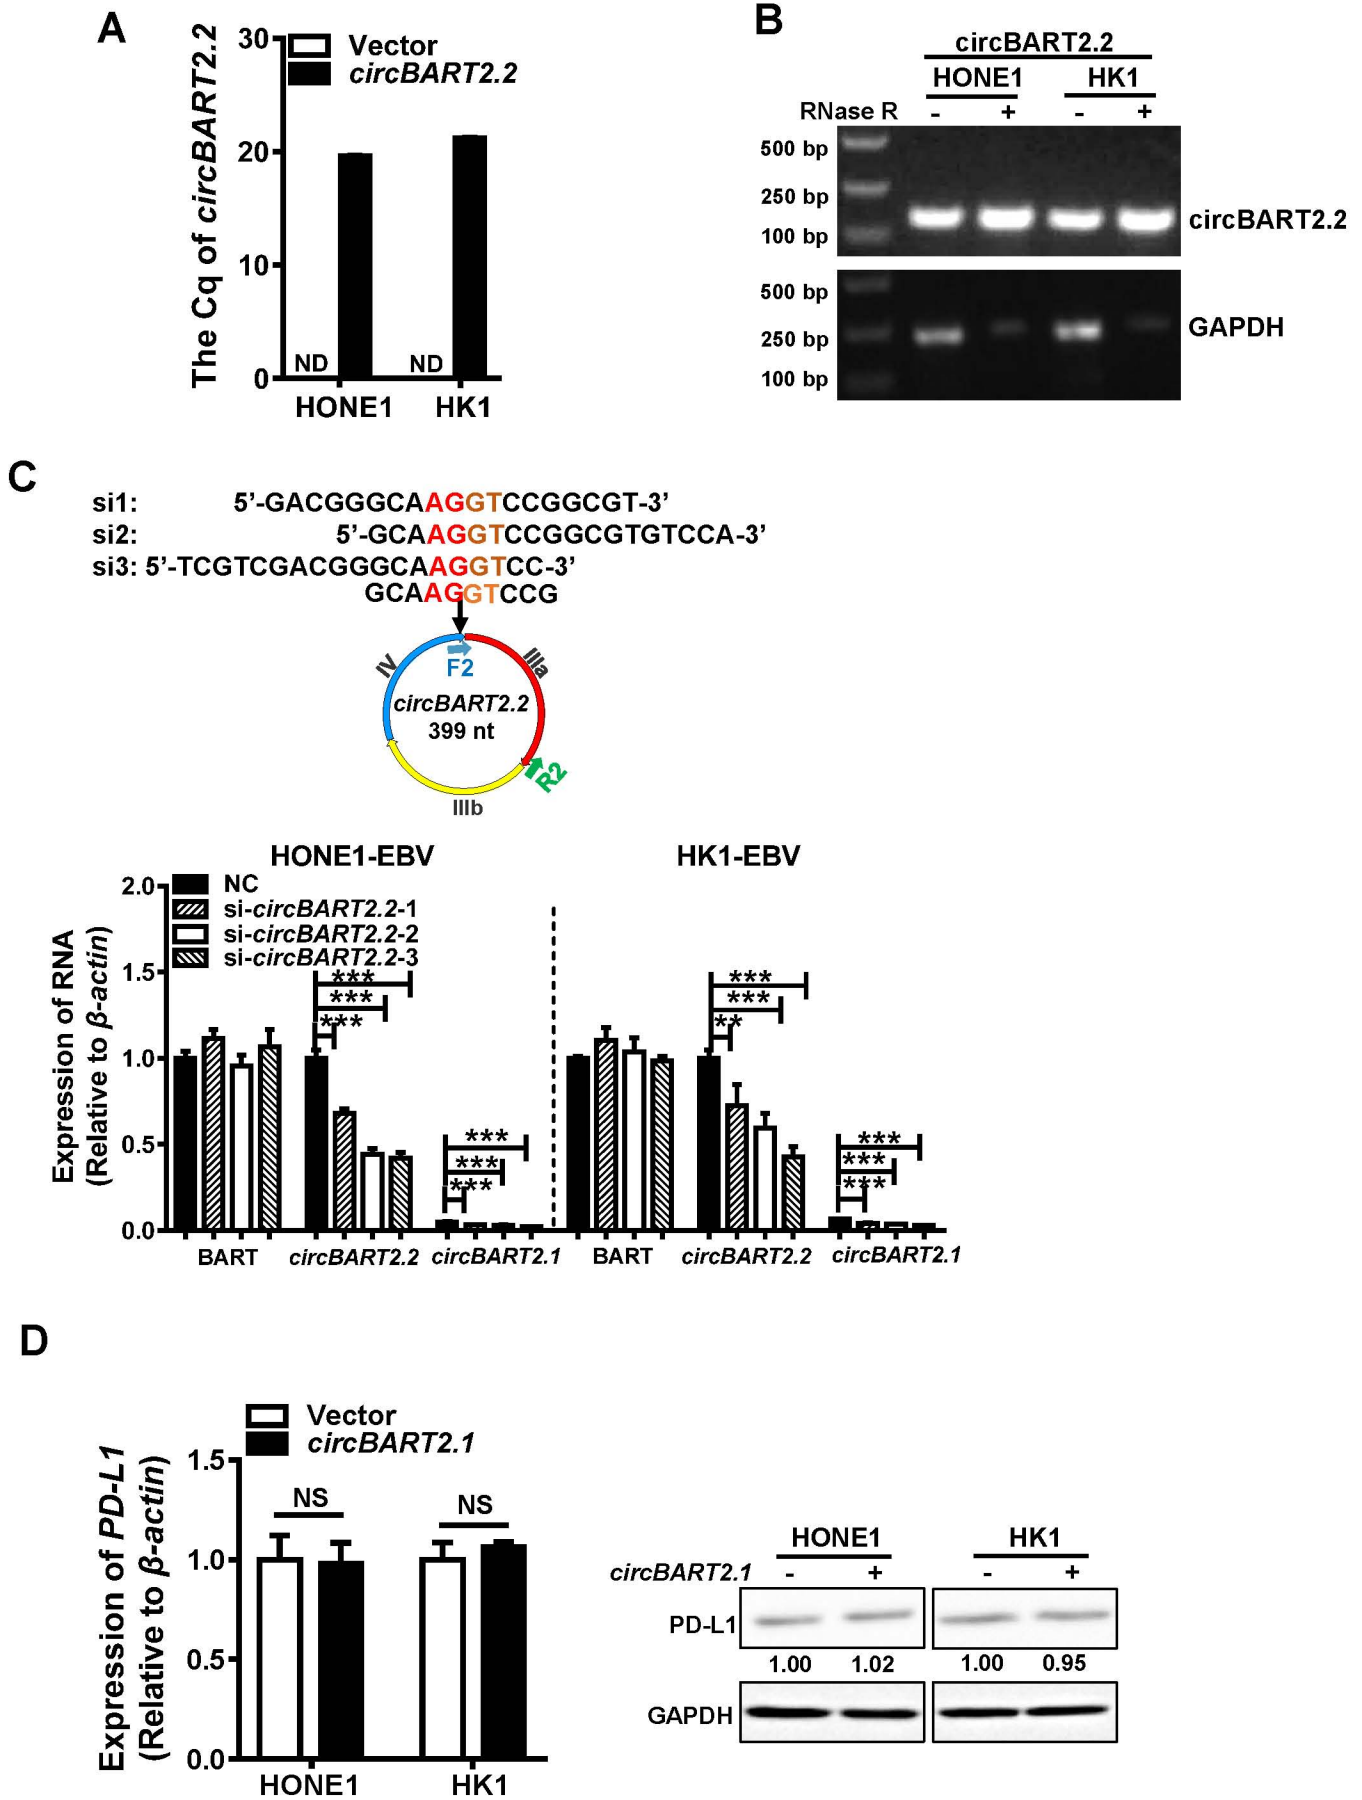

**Fig. S2. Expression of *circBART2.2* in NPC cells after overexpression or knockdown**

- A.** The overexpression efficiency of *circBART2.2* was examined in HONE1 and HK1 cells using the overexpression *circBART2.2* vector by RT-PCR. ND, no detection.
- B.** The stability of *circBART2.2* was detected in RNase R-treated HONE1-EBV and HK1-EBV cells after overexpression of *circBART2.2* by qPCR. GAPDH mRNA was used as the negative control.
- C.** The knockdown efficiency of *si-circBART2.2* was examined in HONE1-EBV and HK1-EBV cells by RT-PCR using three *circBART2.2* siRNAs. All three siRNAs were specifically designed according to the circular splice site of *circBART2.2*. Linear *BART* RNA and *circBART2.1* were used as controls. \*\*, P < 0.01; \*\*\*, P < 0.001.
- D.** The expression of PD-L1 protein was examined in EBV-negative HONE1 and HK1 cells after *circBART2.1* overexpression, as demonstrated by RT-PCR and western blotting.

**Fig.S3**

**A**

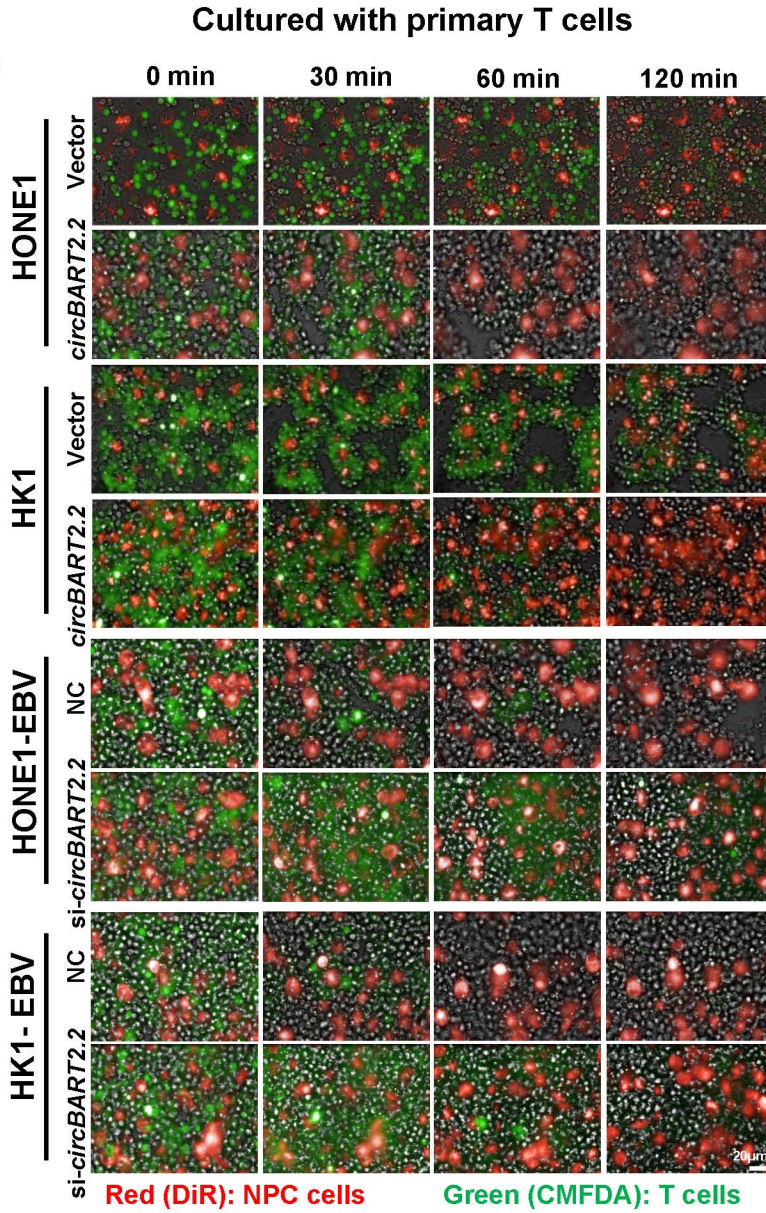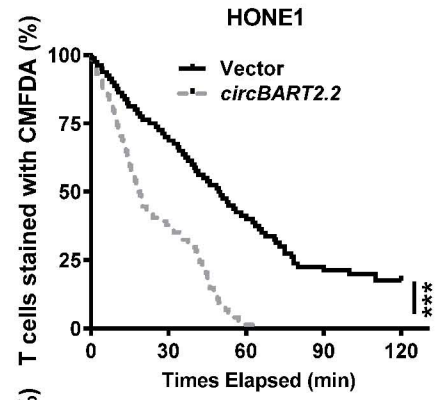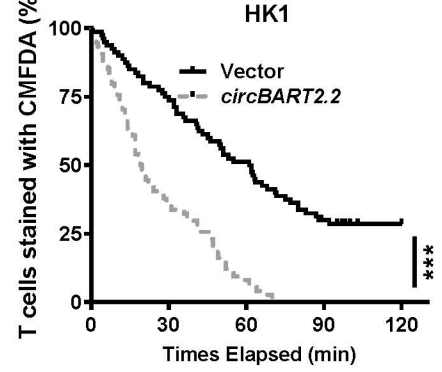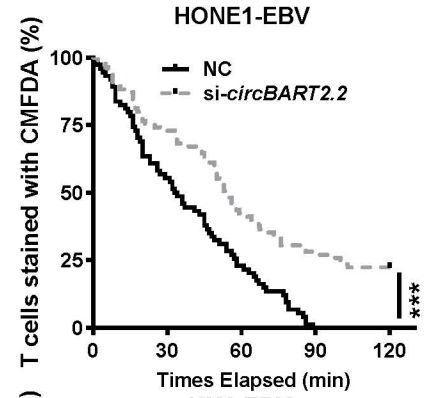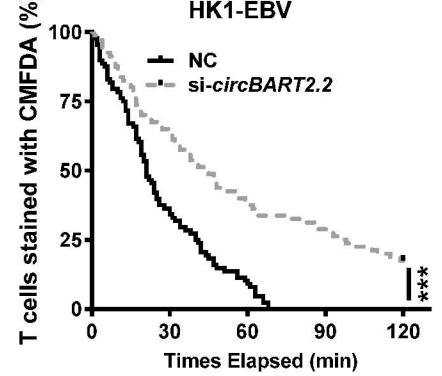

Fig.S3

B

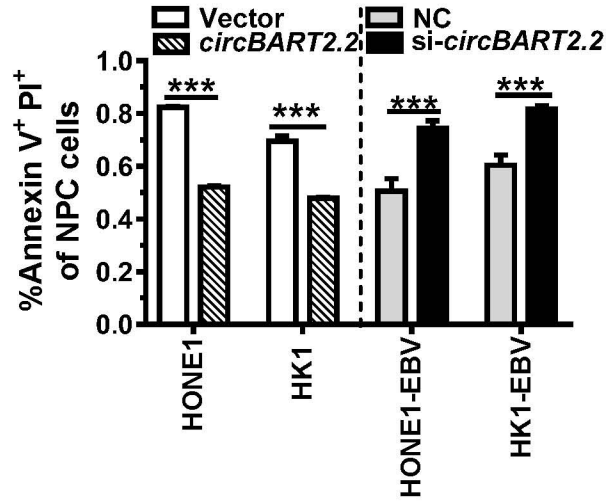

Apoptosis of NPC cells

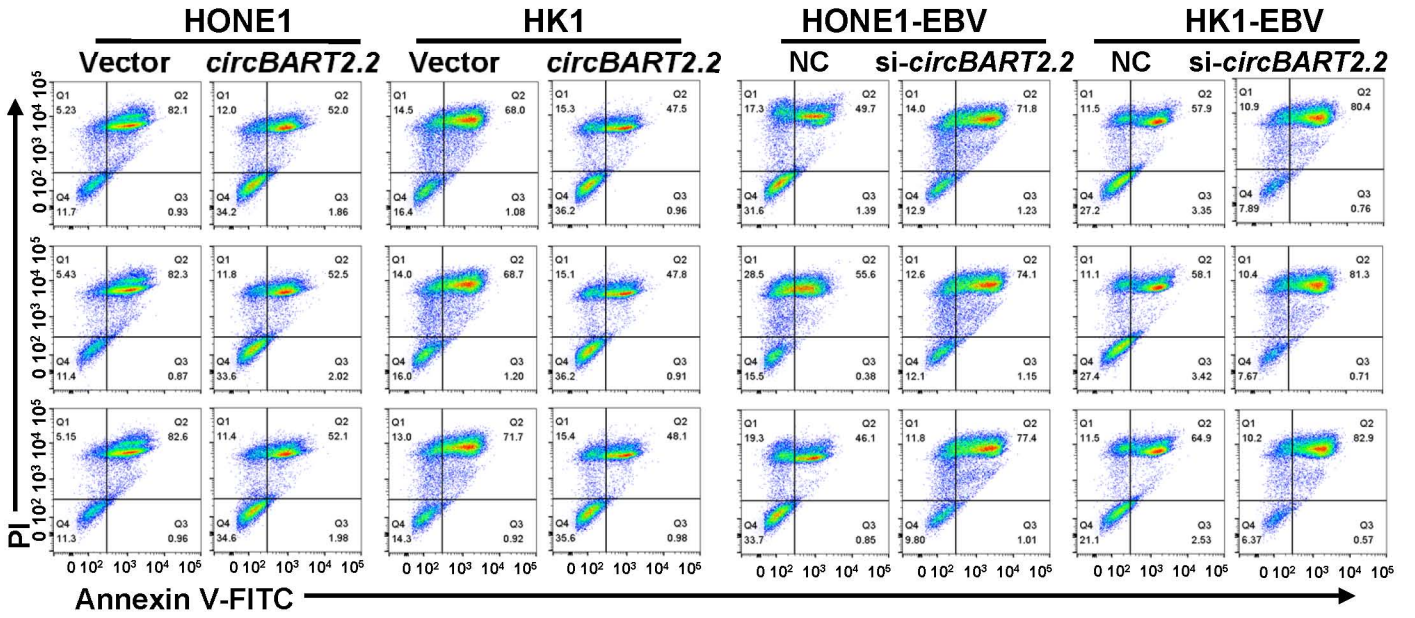

**Fig.S3**

**C**

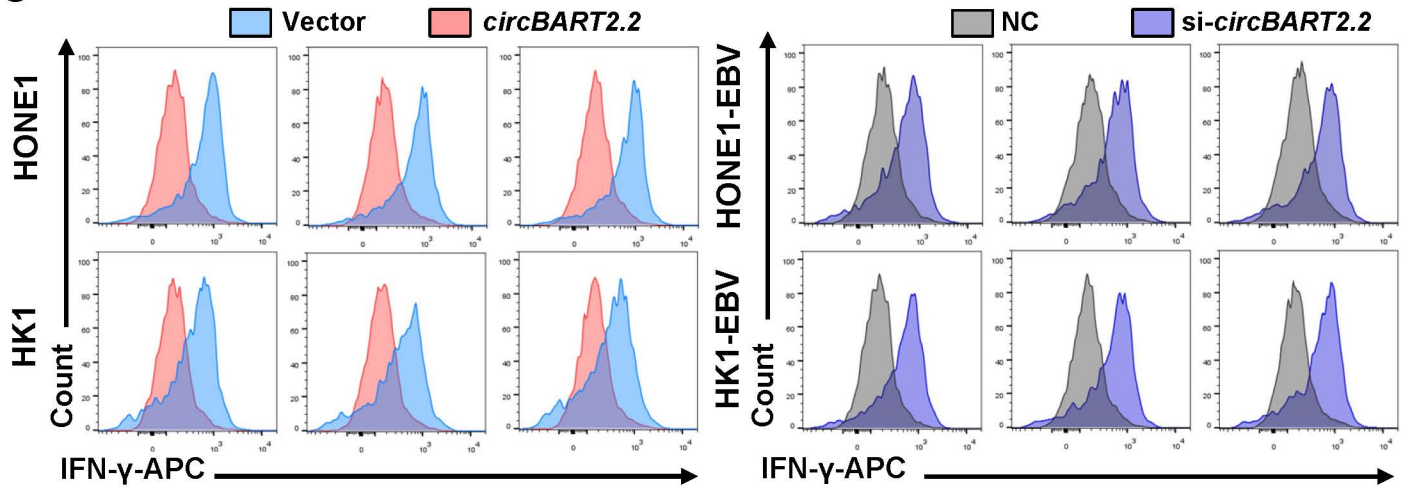

**D**

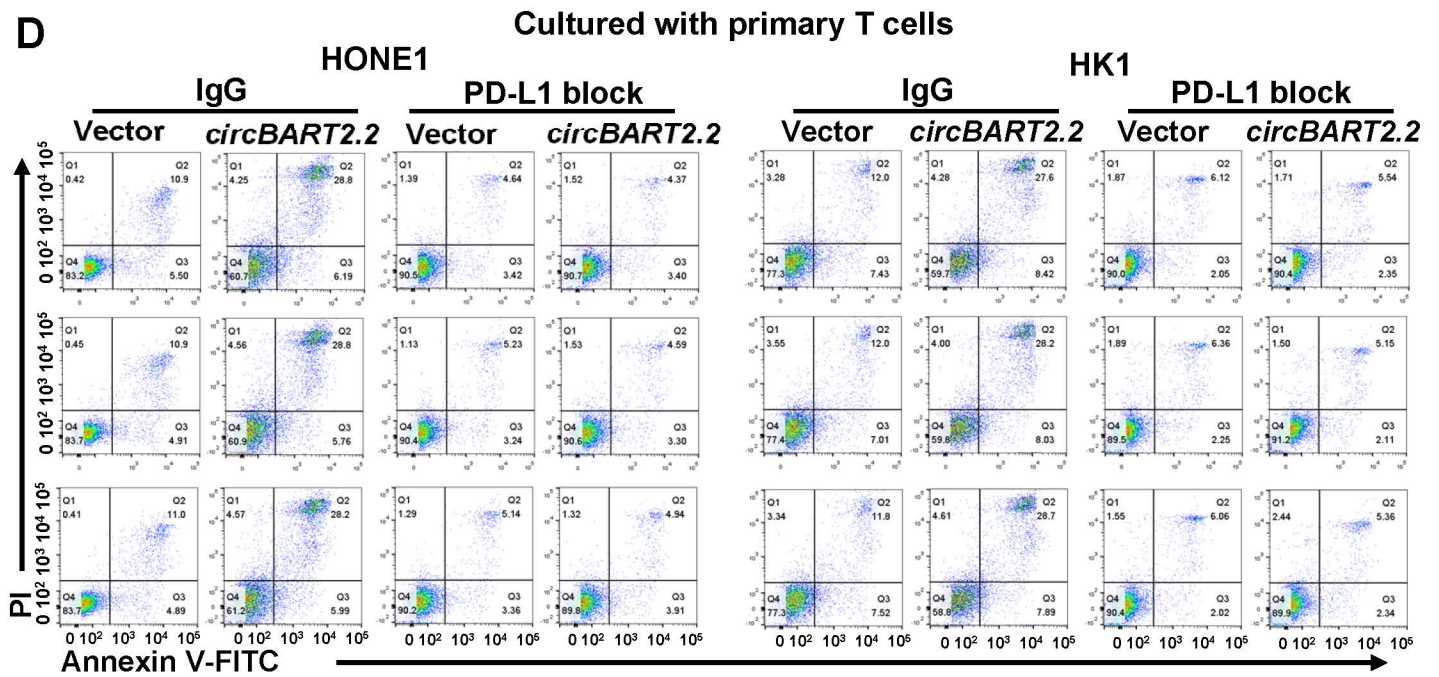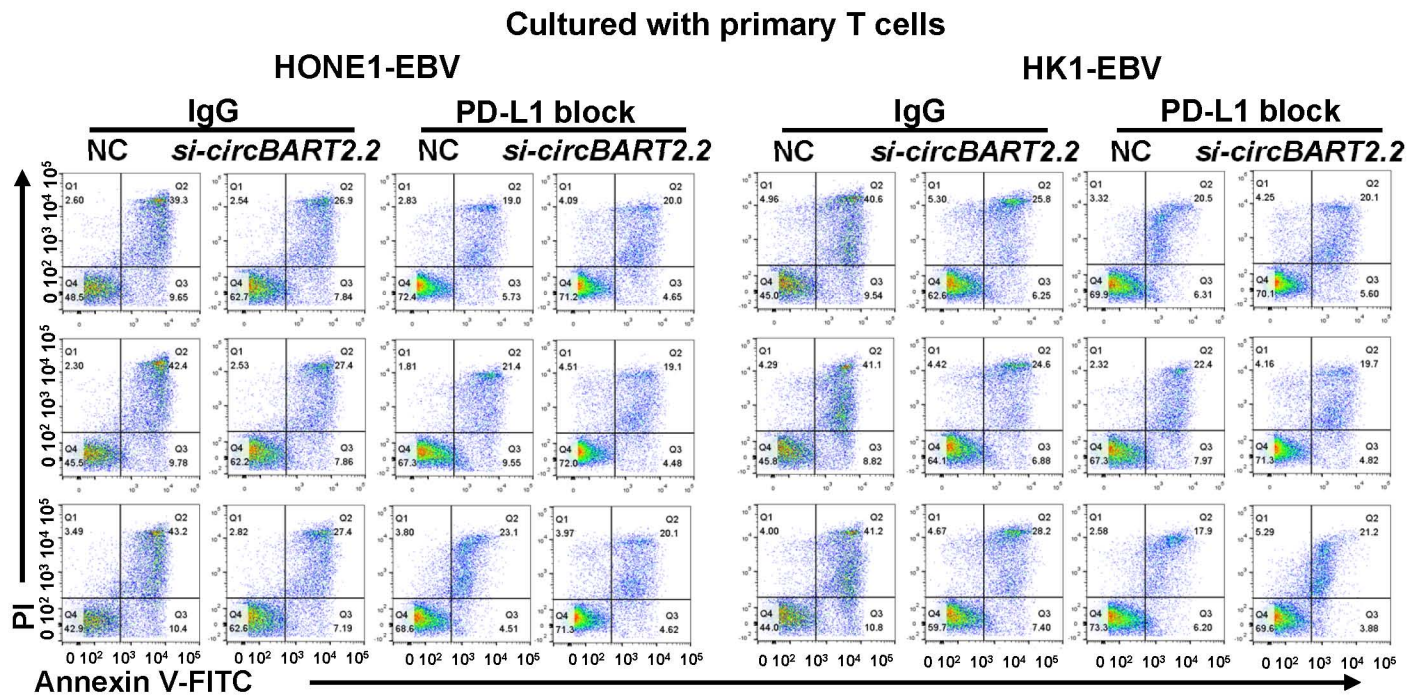

**Fig. S3. *circBART2.2* affected the activity of T-cells through PD-L1**

- A.** Real-time tracking of T-cell activity status was measured using a high-content cell imaging analysis system. Red: HONE1 or HK1 cells after *circBART2.2* overexpression and simultaneous RIG-I knockdown. Red (DiR): NPC cells; green (CMFDA): activated human primary T-cells. Left, representative images for each time point. Right, statistical results according to the green CMTDA signal in T-cells. \*\*\*,  $P < 0.001$ .
- B.** The degree of NPC cell apoptosis in HONE1 and HK1 cells after *circBART2.2* overexpression and co-culture with active primary T-cells was measured by flow cytometry using Annexin V-FITC and PI. Original flow cytometry results (left); statistical results (right).
- C.** The original flow cytometry results regarding the concentration of IFN- $\gamma$  secretion by serum in HONE1 and HK1 cells after *circBART2.2* overexpression or HONE1-EBV and HK1-EBV cells after *circBART2.2* knockdown using APC-stained anti-IFN- $\gamma$  antibody.
- D.** The original flow cytometry results regarding the degree of T-cell apoptosis in HONE1 and HK1 cells after *circBART2.2* overexpression or HONE1-EBV and HK1-EBV cells after *circBART2.2* knockdown when treated with anti-PD-L1 antibody using Alexa Fluor 488 Annexin V and propidium iodide (PI) staining.



Fig.S4

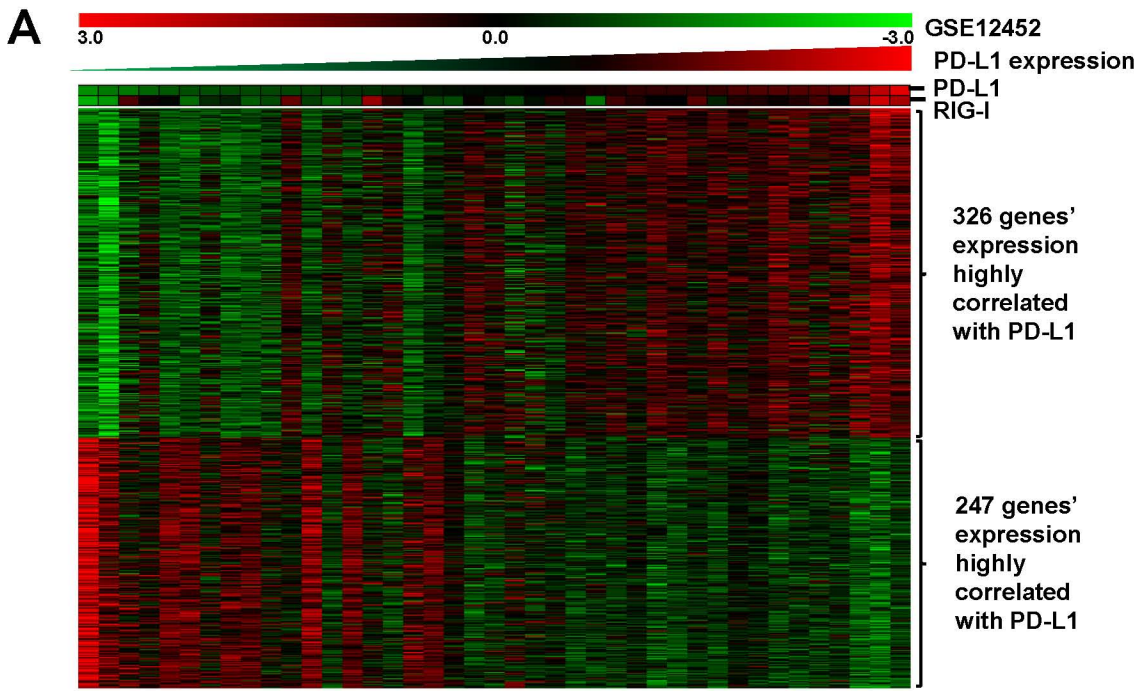

**B**

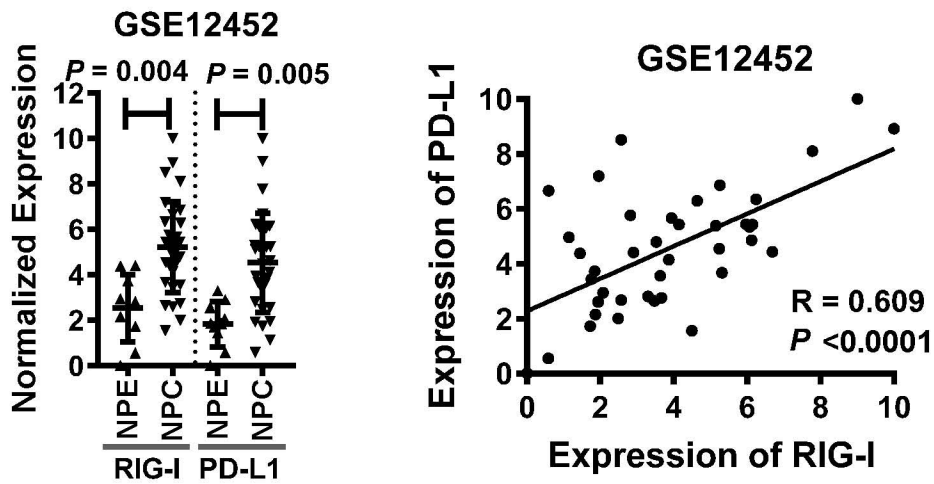

**C**

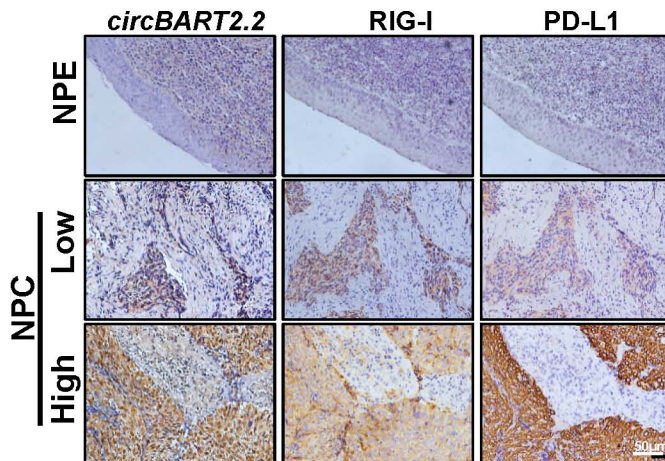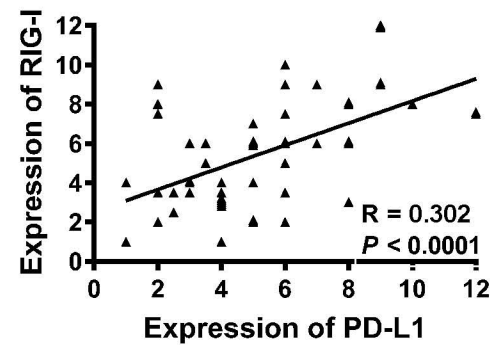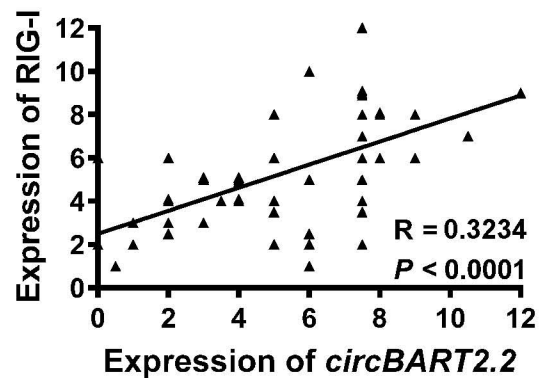

**Fig. S4. PD-L1 and RIG-I were highly expressed in NPC and correlated with each other**

- A.** Heat-map of the 172 molecules' expression, which was screened from mass spectrometry, in the head and neck squamous cell carcinoma samples (HNSCC) TCGA database. The TCGA data were ranked by PD-L1 expression from low to high, and the 172 molecules were then analyzed for expression and correlation with PD-L1 expression in HNSCC samples. RIG-I was significantly correlated with PD-L1 expression in HNSCC samples from the TCGA database using heat-map analysis ( $P = 6.1e-4$ ,  $R = 3.2$ ).
- B.** The expression of PD-L1 and RIG-I was analyzed and correlated with each other in the public online NPC GSE12452 database. Both PD-L1 ( $P = 0.009$ ) and RIG-I ( $P = 0.001$ ) were highly expressed in 31 NPC clinical samples compared with 10 NPE samples NPE,  $n = 10$ ; NPC,  $n = 31$ ,  $P = 0.0124$ ,  $R = 0.1499$ .
- C.** The correlation of PD-L1 ( $P < 0.0001$ ,  $R = 0.3234$ ) and RIG-I ( $P < 0.0001$ ,  $R = 0.302$ ) with *circBART2.2* was analyzed in 52 NPC tissues and 36 non-cancerous nasopharyngeal epithelial tissue samples by *in situ* hybridization or immunohistochemistry.

Fig.S5

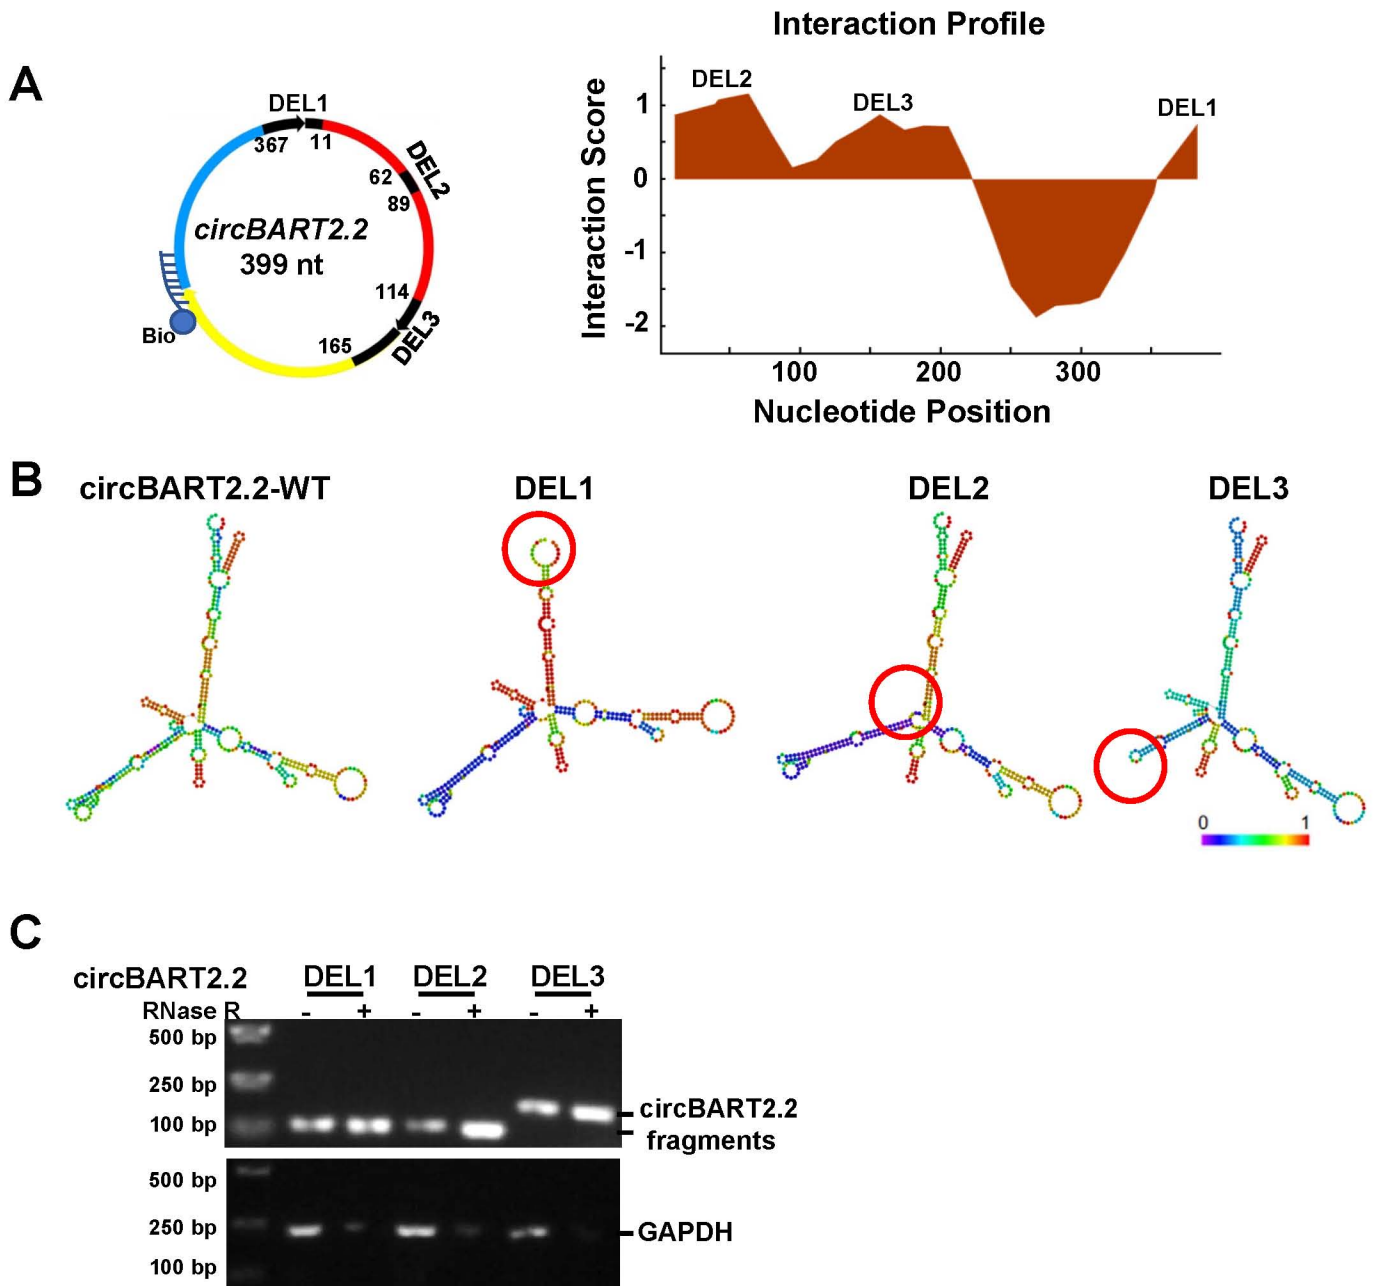

**Fig. S5. *circBART2.2* interacted with RIG-I protein**

- A. Three well characterized stem loop structures (367–11 bp named Mut 1, 114–165 bp named Mut 2, and 62–89 bp named Mut 3) were predicted on the *circBART2.2* using the RNAfold database.
- B. RIG-I was predicted to bind with the *circBART2.2* sequence using the catRAPID software.
- C. Stability of three *circBART2.2* fragments was detected in RNase R-treated HONE1 cells after the overexpression of three *circBART2.2* fragments (Mut1, Mut2, and Mut3) by qPCR, respectively. The GAPDH mRNA was used as a negative control.

**Fig.S6**

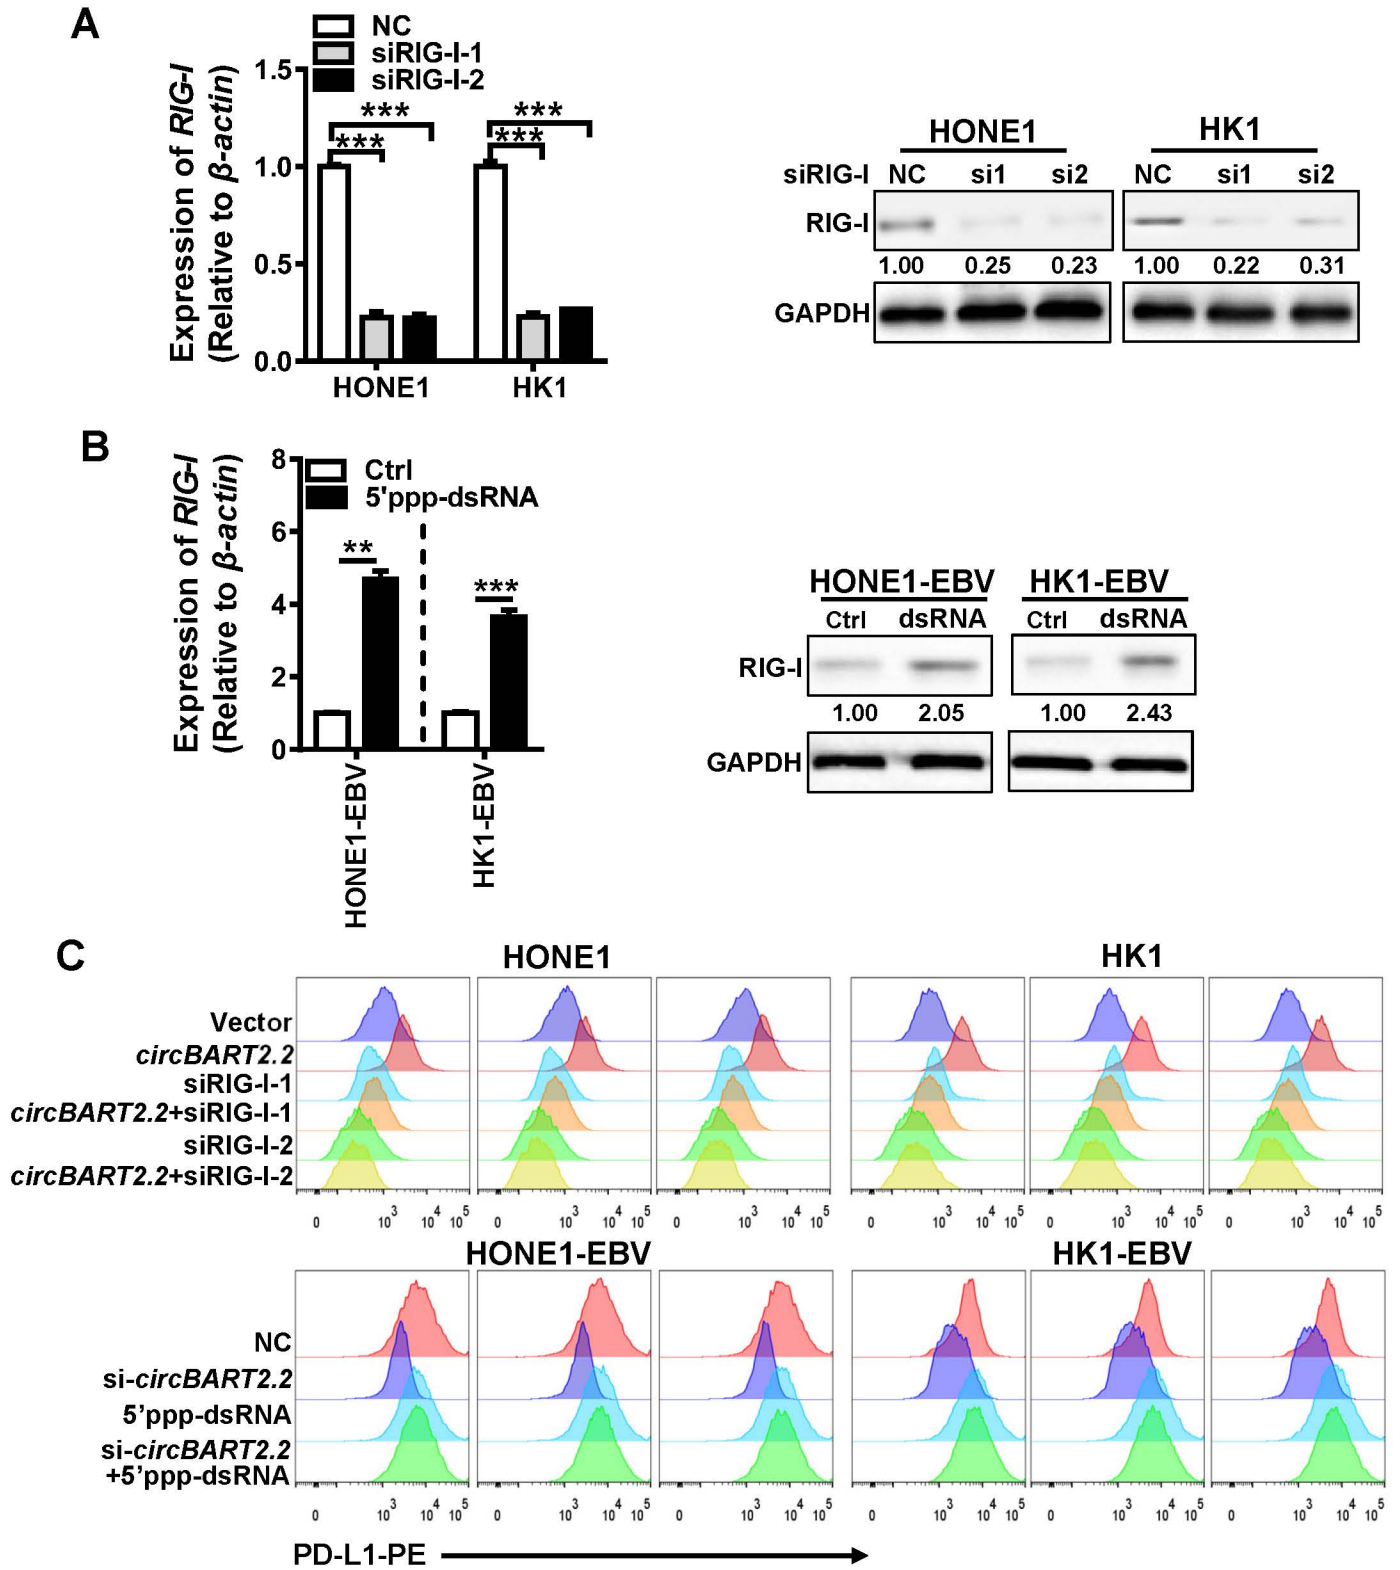

Fig.S6

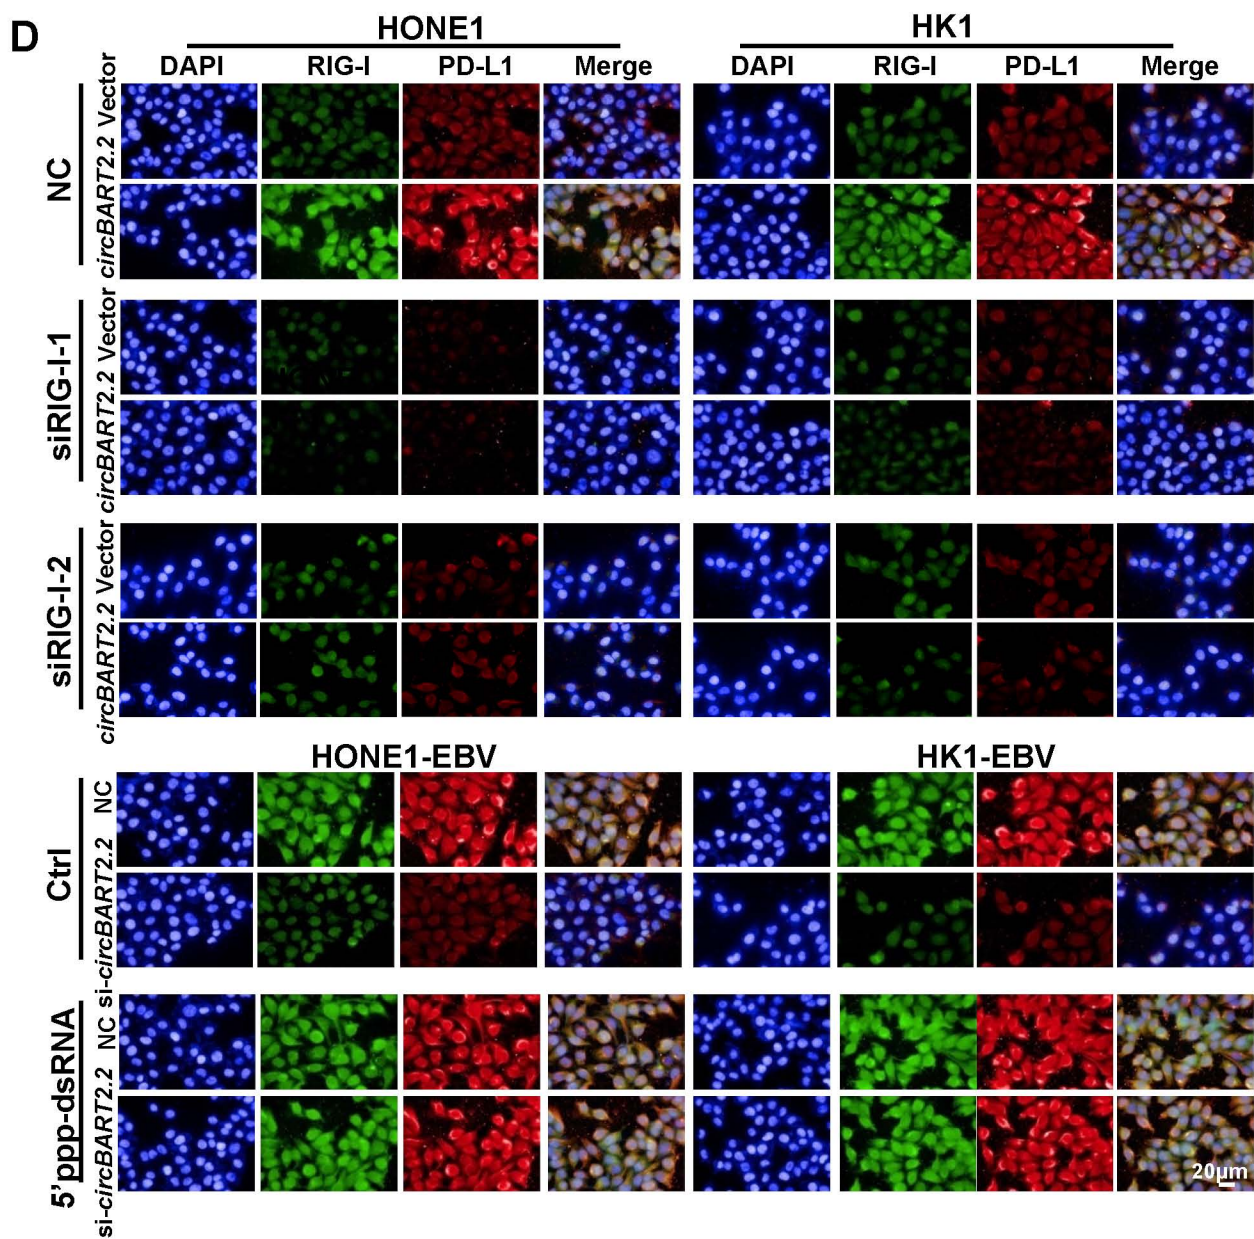

**Fig. S6. *circBART2.2* regulated PD-L1 expression through RIG-I**

- A. The knockdown efficiency of *siRIG-I* was examined in HONE1 and HK1 cells using two RIG-I siRNAs by RT-PCR and western blotting. \*\*\*,  $P < 0.001$ .
- B. The efficiency of RIG-I activator 5' ppp-dsRNA was examined in HONE1-EBV and HK1-EBV cells by RT-PCR and western blotting. \*\*\*,  $P < 0.001$ .
- C. The original flow cytometry results of PD-L1 expression in EBV-negative HONE1 and HK1 cells after *circBART2.2* overexpression or knockdown of RIG-I simultaneously or in EBV-positive HONE1-EBV and HK1-EBV cells after *circBART2.2* knockdown and RIG-I activator treatment. Three independent replicates were evaluated for each group.
- D. RIG-I (green) and PD-L1 (red) expression was measured in EBV-negative or -positive NPC cells after *circBART2.2* overexpression or knockdown by immunofluorescence using anti-RIG-I and anti-PD-L1 antibodies. Nuclei were stained with DAPI (blue). 200 ×, scale bar = 50 μm.

**Fig.S7**

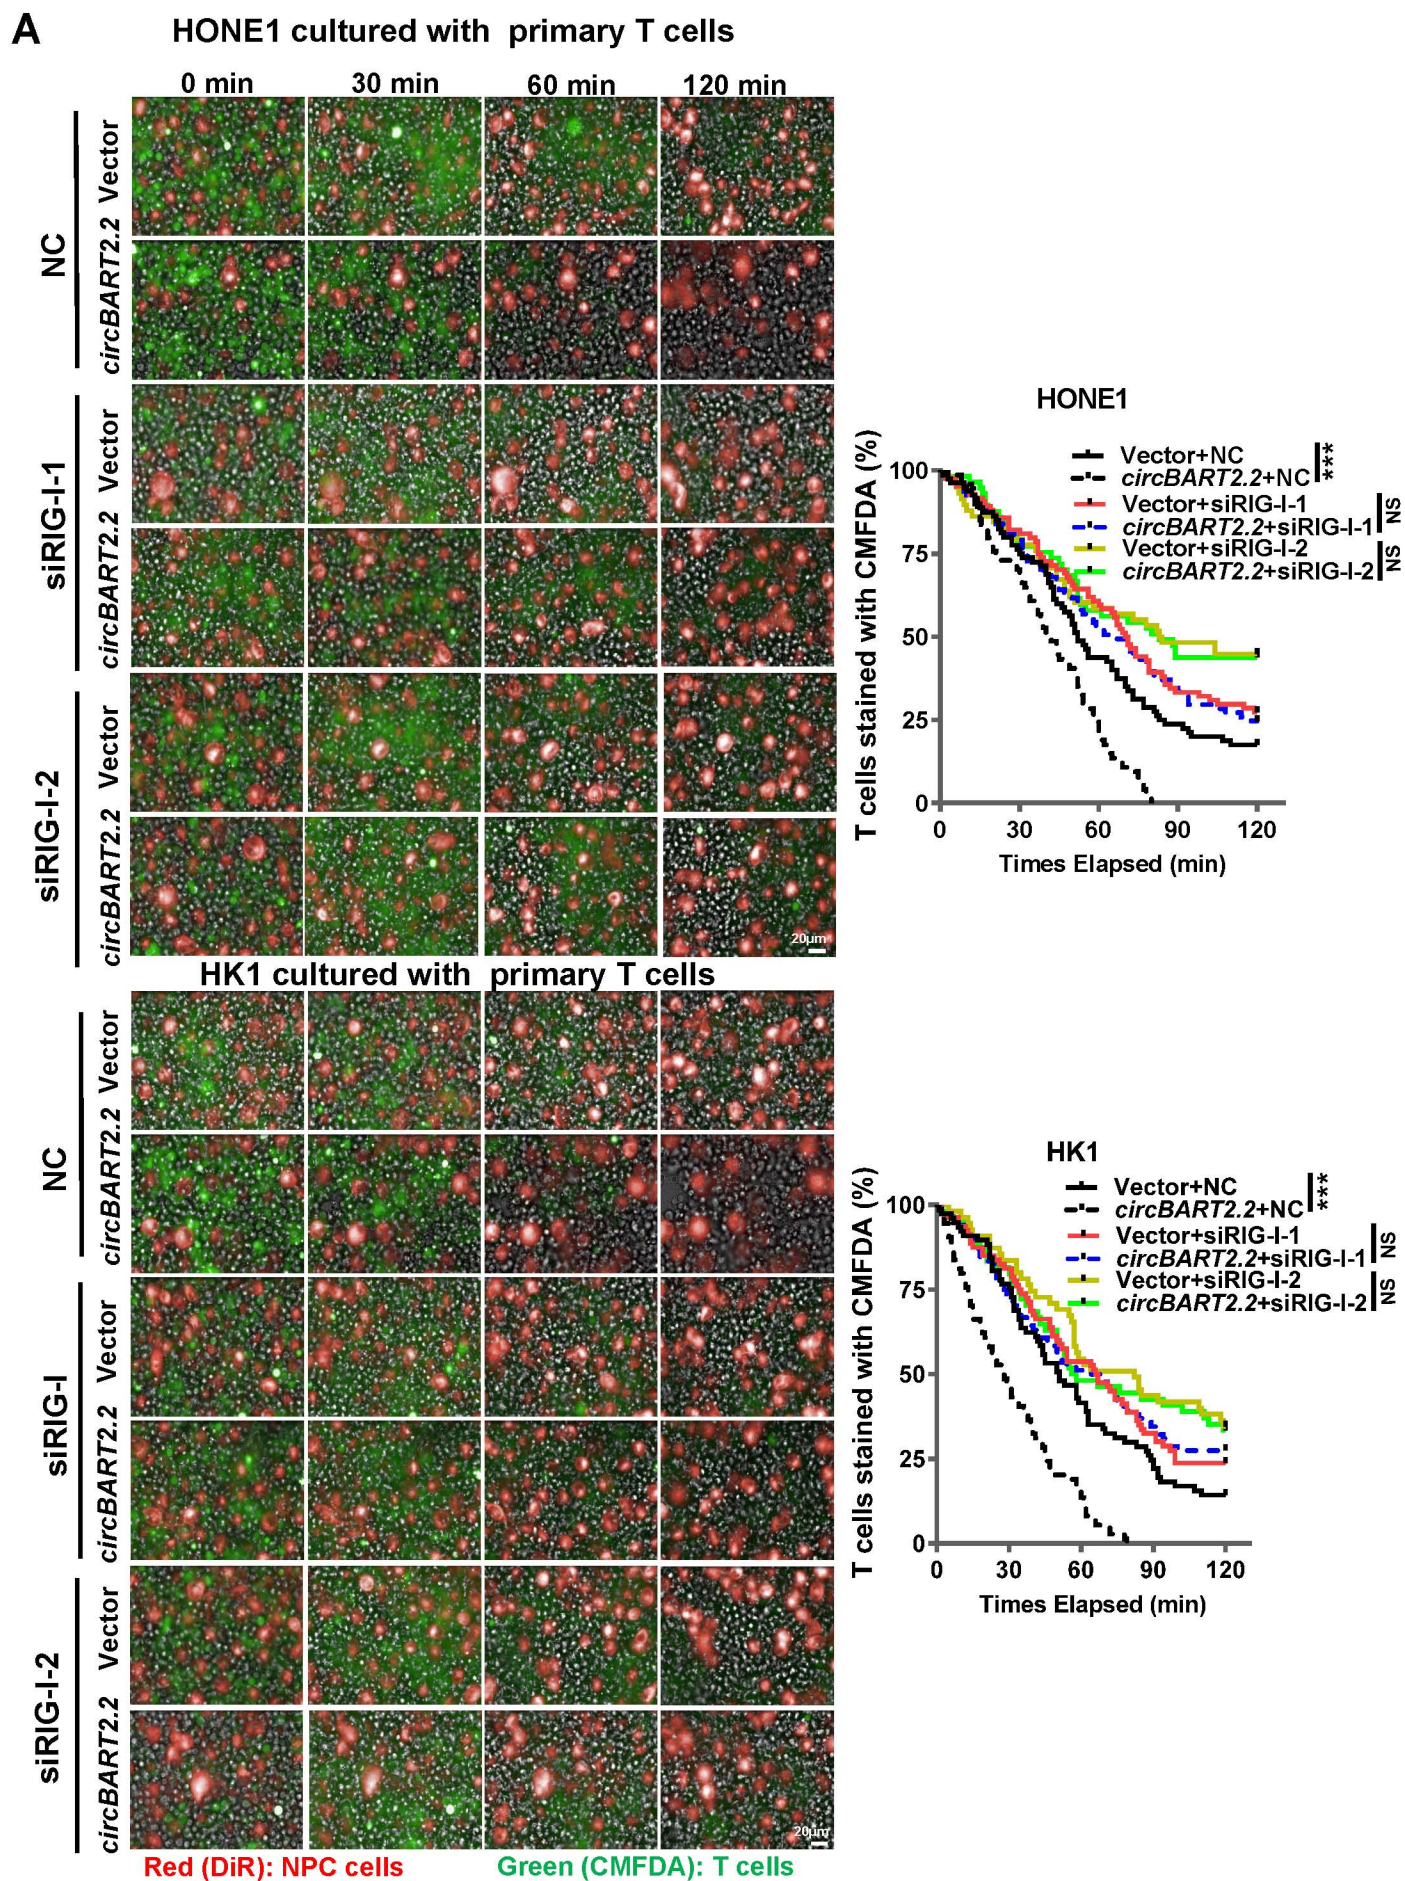



Fig.S7

B

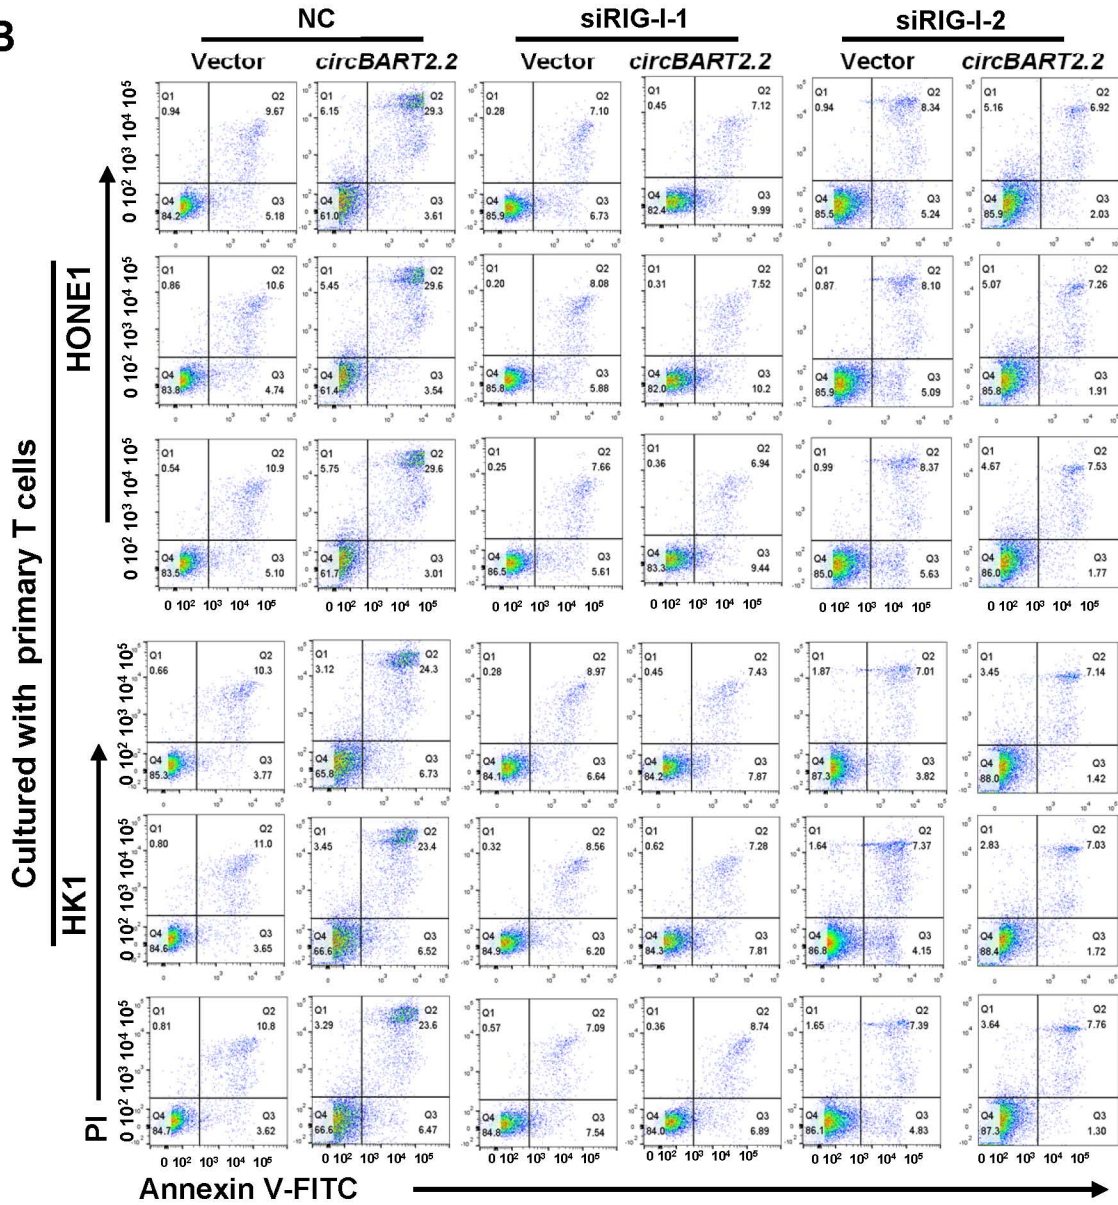

C

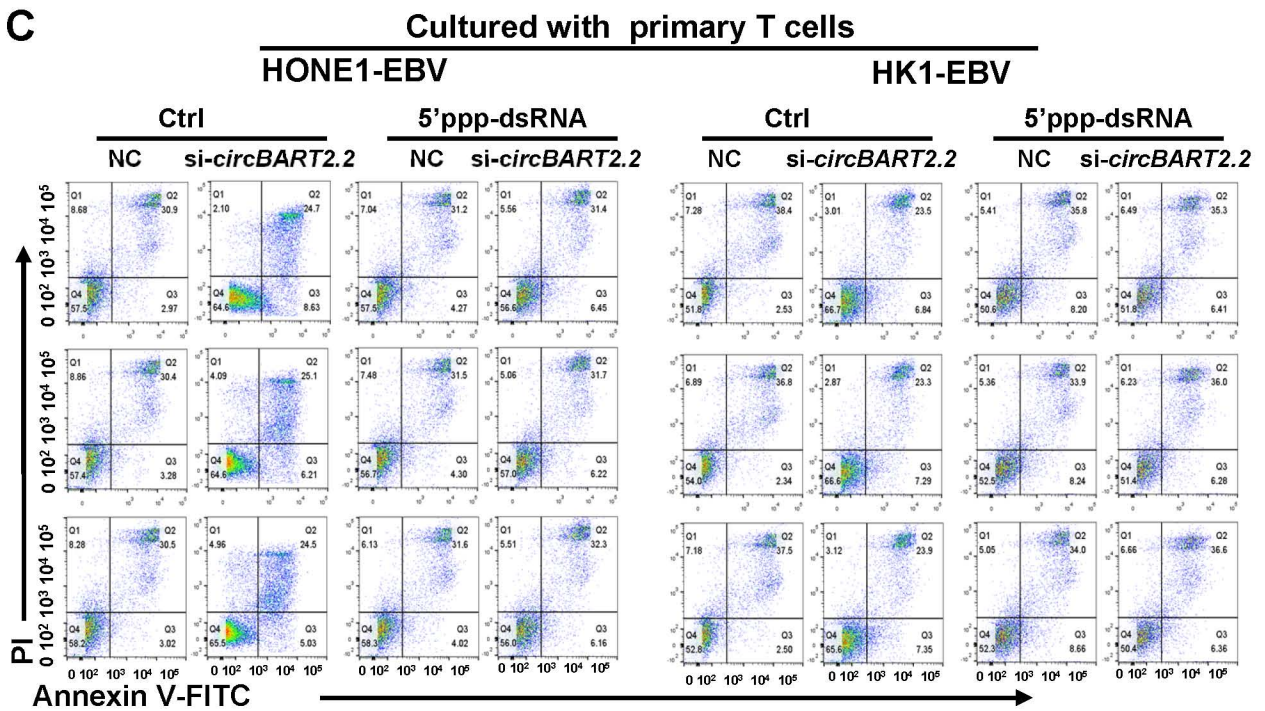

**Fig. S7. *circBART2.2* affected the activity of T cells through RIG-I**

- A. Real-time tracking of T-cell activity status using high-content cell imaging analysis of co-culture of EBV-negative or -positive NPC cells after *circBART2.2* overexpression or knockdown. Red: NPC cell lines. Green: activated human primary T-cells Red (DiR): NPC cells; green (CMFDA): activated human primary T-cells. Left, representative images for each time point. Right, statistical results according to the green CMTDA signal in T-cells. \*\*\*,  $P < 0.001$ .
- B. Apoptosis of primary human T-cells was examined by flow cytometric analysis in co-culture with HONE1 and HK1 cells after *circBART2.2* overexpression and simultaneous RIG-I knockdown. Each experiment was independently repeated three times. The statistical results are shown at the bottom. NS, not significant; \*\*\*,  $P < 0.001$ .
- C. The degree of T-cell apoptosis in HONE1-EBV and HK1-EBV cells after *circBART2.2* knockdown and simultaneous RIG-I activator 5'-ppp-dsRNA treatment using Alexa Fluor 488 Annexin V and propidium iodide (PI) staining. Each experiment was independently repeated three times; the statistical results are shown at the bottom. NS, not significant; \*\*\*,  $P < 0.001$ .

Fig.S8

A

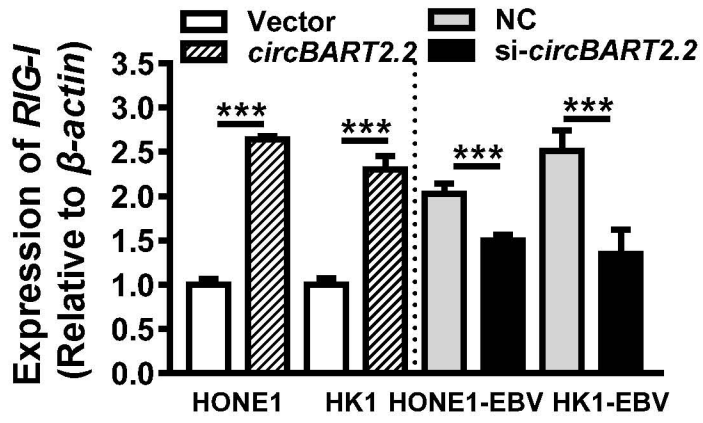

B

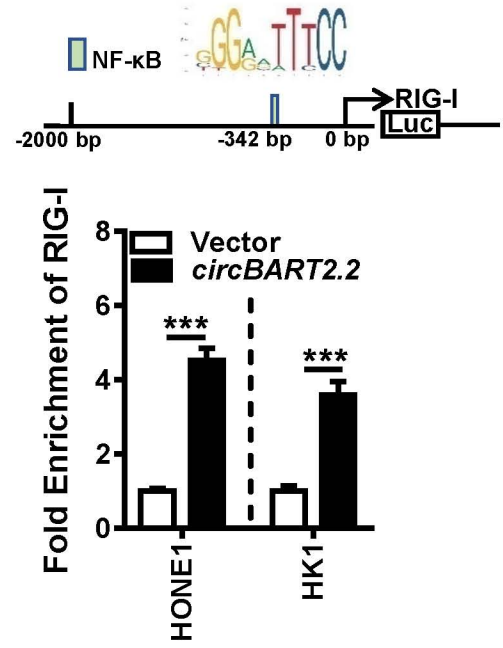

**Fig. S8. *circBART2.2* promoted RIG-I activation**

- A. *RIG-I* mRNA expression was measured by RT-PCR in EBV-negative HONE1 and HK1 cells or EBV-positive HONE1-EBV and HK1-EBV cells after *circBART2.2* overexpression or knockdown.\*\*\*,  $P < 0.001$ .
- B. Binding of the transcription factor NF- $\kappa$ B near -342 bp on the RIG-I promoter region was predicted by the JASPAR software (up) and detected in HONE1 and HK1 cells after the overexpression of *circBART2.2* by CHIP assays according to the predicted NF- $\kappa$ B binding sites.

**Fig.S9**

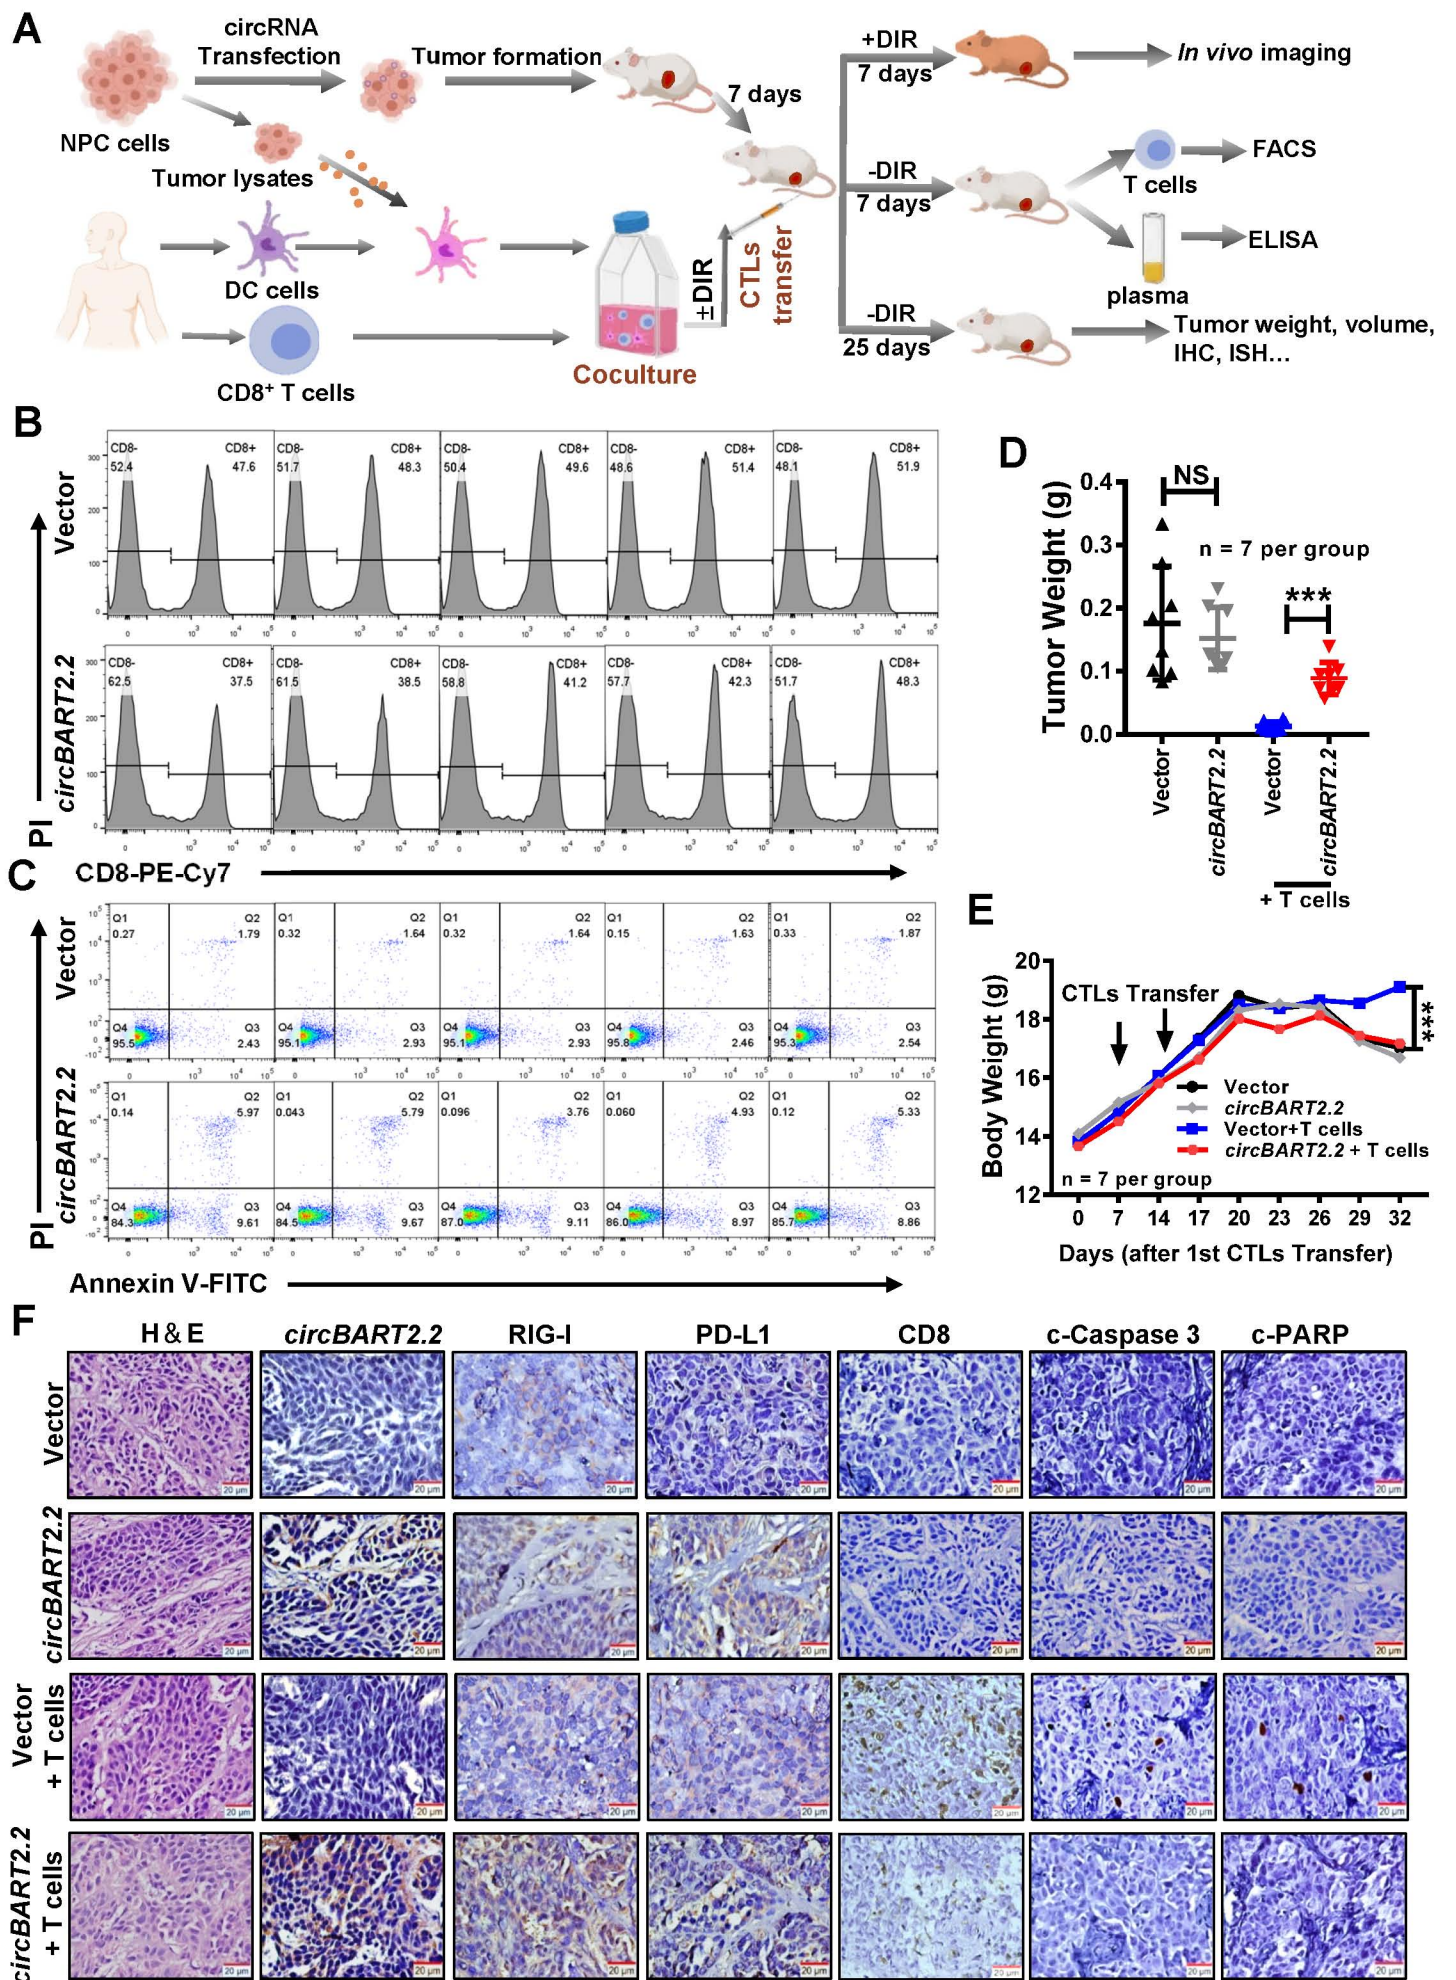

**Fig.S9. *circBART2.2* promoted NPC immune escape in xenograft mice models of NPC.**

- A. Schematic diagram of HONE1 cell-derived-xenograft mice models after injection of activated T cells. A density of  $5 \times 10^6$  HONE1 cells that were transfected with the *circBART2.2* overexpression vector or the negative control (NC) were injected subcutaneously into the root of the right thigh of the mice (22 mice per group). To prepare dendritic cells and T cells, dendritic cells were first co-cultured with HONE1 cell lysate for 24 hours, and then co-cultured with T cells to present HONE1 specific tumor antigens to T cells to enable them to produce HONE1 specific T cells. Then  $5 \times 10^7$  T cells with or without Deep Red live cell fluorescent dye (DiR) were infused into HONE1 cell-derived-xenograft mice through the tail vein when palpable tumors were formed after 7 days injection. For DiR-injected mice (3 mice per group), the small animal live imaging system was used to observe the accumulation of DiR+T cells at the tumor-forming site. For non-DiR-injected mice, activated T cells (5 mice per group) were injected into each tumor for another 7 days. Next, the peripheral blood of mice was extracted for flow cytometry, qRT-PCR, and ELISA. In another set, activated T cells were injected into each tumor for another 25 days and the tumor weight and volume were measured each day (7 mice per group).
- B. The original flow cytometry results about CD8-positive T cells measured by flow cytometry using anti-CD8 antibody in HONE1 cell-derived-xenograft mice models, n = 5 per group.
- C. The original flow cytometry results about the degree of T cell apoptosis measured by flow cytometry in HONE1 cell-derived-xenograft mice models. Mice peripheral blood was extracted for flow cytometry after incubation with Alexa Fluor 488 Annexin V and Propidium Iodide (PI), n = 5 per group.
- D. The tumor weights for each group of nude mice, n = 7 per group. NS, no significance. \*\*\*,  $P < 0.001$ .
- E. The body weight of the mice was measured in each group after 32 days of tumor cell administration, n = 7 per group. \*\*\*,  $P < 0.001$ .

F. Representative images of circBART2.2, RIG-I, PD-L1, CD8, c-Caspase 3, and c-PARP expression in nude mice using in situ hybridization or immunohistochemistry. The statistical results are shown in Fig. 8I, n = 7 per group.
